# Supplementary material for: RNA duplexes with biphenyl substituents as base replacements are less stable than DNA duplexes
Source: Royal Society of Chemistry journal article supplement (doi:10.1039/b419278h), 2005-01-01
Supplement: b419278h.pdf [file b419278h.pdf]

# Supplementary Material (ESI) for Chemical Communications

# This journal is © The Royal Society of Chemistry 2005

## **Electronic Supplementary Information**

### **RNA duplexes with biphenyl-substituents as base replacements are less stable than DNA duplexes**

*Christine Brotschi, Christian J. Leumann*

Department of Chemistry & Biochemistry, University of Bern, Freiestrasse 3, CH-3012 Bern,  
Switzerland

E-mail: [leumann@ioc.unibe.ch](mailto:leumann@ioc.unibe.ch)

### Outline of the synthesis of the rBph nucleoside phosphoramidite **5** for RNA synthesis

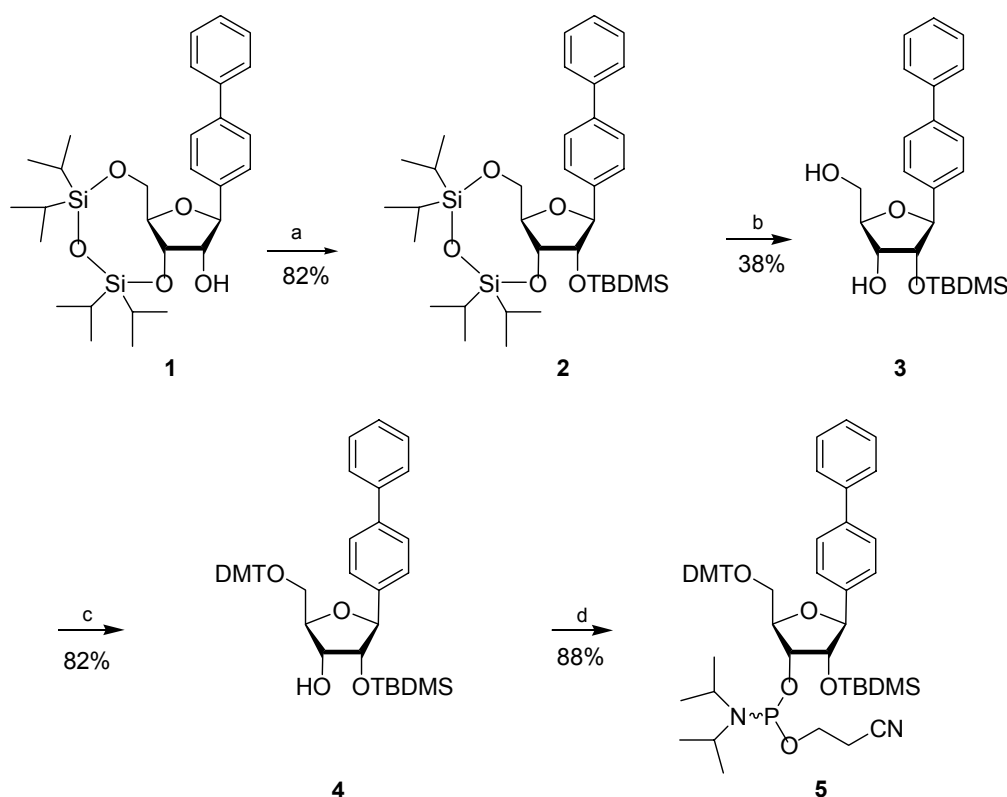

**Scheme S1:** Reagents and conditions: a) **1** (1 equiv.), TBDMS-Cl (1.1 equiv.), DMF, 60°C; b) AcOH (1.5 equiv.), TBAF (2 equiv.), THF, 0 °C; c) 4,4'-dimethoxytrityl chloride (1.6 equiv.), pyridine, RT; d) *i*Pr<sub>2</sub>NEt (3 equiv.), [(*i*Pr<sub>2</sub>N)(NCCH<sub>2</sub>CH<sub>2</sub>O)P]Cl (1.5 equiv.), THF, RT.

### ABBREVIATIONS

EtOAc: Ethylacetate; TBAF: *tert*-Butylammonium fluoride; TEA: triethylamine; TBDMS-Cl: *tert*-Butyldimethylsilyl chloride; TIPDS: 1,3-dichloro-1,1,3,3-tetraisopropyl disiloxane; DMT: 4,4'-dimethoxytrityl.

### EXPERIMENTAL PART

**General:** Reactions were performed under argon in distilled, anhydrous solvents. All chemicals were reagent grade from *Fluka* or *Aldrich*. <sup>1</sup>H NMR (300 MHz, 500 MHz) spectra were recorded on a Bruker AC-300 or Bruker DRX-500 spectrometer; the chemical shifts δ=

# Supplementary Material (ESI) for Chemical Communications

# This journal is © The Royal Society of Chemistry 2005

ppm were referenced to residual undeuterated solvent ( $\text{CDCl}_3 = 7.27$ ),  $J = \text{Hz}$ .  $^{13}\text{C}$  NMR (75 MHz) were recorded on a Bruker AC-300; the chemical shifts  $\delta = \text{ppm}$  were referenced to residual undeuterated solvent  $\text{CDCl}_3 = 77.00$ ). Carbon multiplicity (s,d,t,q) from DEPT spectra.  $^{31}\text{P}$  NMR spectra (162 MHz) were recorded on a Bruker DRX-400 spectrometer; the chemical shift  $\delta = \text{ppm}$  was referenced to 85%  $\text{H}_3\text{PO}_4$  as external standard. LSIMS and EI mass spectra were recorded on a Auto Speq Q VG at 70eV, ESI-MS mass spectra on a Fisons Instrument VG Platform. For TLC, pre-coated plates SIL-G UV254 (*Macherey Nagel*) have been used and visualized by UV and/or dipping into a solution of  $\text{Ce}(\text{SO}_4)_2$  (10.5 g), phosphormolybdic acid (21 g),  $\text{H}_2\text{SO}_4$  (60 mL), and  $\text{H}_2\text{O}$  (900 mL). Flash chromatography (FC) was performed with silica Gel 60 (230-400 mesh).

**4-(3',5'-O-(1,1,3,3-Tetraisopropylidisiloxan-1,3-diyl)-2'-O-TBDMS- $\beta$ -D-ribofuranosyl)-biphenyl (2).** A solution of **1**<sup>1</sup> (985 mg, 1.86 mmol) in dry DMF (3.7 mL) was treated with TBDMS-Cl (308 mg, 2.05 mmol) and stirred for 2 h at 60°C. The mixture was taken up in  $\text{NaHCO}_3$  (100 mL) and extracted with EtOAc (3 × 80 mL). The organic phase was dried ( $\text{MgSO}_4$ ) and concentrated *in vacuo*. Purification by FC (silica gel; hexane/EtOAc 11:1) yielded 982 mg (82%) of **2** as white solid.  $R_f$  0.74 (hexane/EtOAc 10:1).  $^1\text{H}$  NMR (300 MHz,  $\text{CDCl}_3$ ,  $\delta$  (ppm)): 7.59 (m, 9H, ArH); 4.98 (s, 1H, C1'H); 4.35 (m, 2H, C3'H, C4'H); 4.14-4.12 (m, 1H, C5'H); 4.06-4.03 (m, 2H, C4'H, C5'H); 1.16-0.99 (m, 37H, (TIPDS), Si-C(CH<sub>3</sub>)<sub>3</sub>); 0.15 (s, 3H, Si-(CH<sub>3</sub>)<sub>2</sub>); 0.12 (s, 3H, Si-(CH<sub>3</sub>)<sub>2</sub>).  $^{13}\text{C}$  NMR (75 MHz,  $\text{CDCl}_3$ ,  $\delta$  (ppm)): 141.92, 140.39, 140.17 (3s, ArC); 128.74, 127.20, 127.06, 127.04, 126.12 (5d, ArC); 87.39 (d, C2'); 80.28 (d, C4'); 79.53 (d, C1'); 69.38 (d, C3'); 60.39 (t, C5'); 25.81 (q, Si-C(CH<sub>3</sub>)<sub>3</sub>); 18.20, 17.59, 17.45, 17.44, 17.33, 17.12, 17.02, 16.97 (8q, CH<sub>3</sub>-(TIPDS)); 13.43, 13.09, 13.04, 12.89 (4d, CH-*i*Pr); -4.344, -4.60 34 (2q, Si-(CH<sub>3</sub>)<sub>2</sub>). MS (70eV, EI):  $m/z$  (%): 643.53 (28), 511.25 (100).

**4-(2'-*O*-TBDMS- $\beta$ -D-ribofuranosyl)-biphenyl (3).**<sup>2</sup> To a stirred solution of **2** (500 mg, 0.78 mmol) in THF (9.0 mL) was added acidic acid (98  $\mu$ l, 1.71 mmol) and TBAF (1 M in THF, 1.54 mL) at 0°C. The reaction was followed by TLC, and as soon as the deprotection of the TBDMS-group at the C2' position occurred the reaction was quenched (EtOAc/H<sub>2</sub>O, reaction time between 2 to 8 h). The separated organic layer was washed with water, followed by brine. The organic phase was dried (MgSO<sub>4</sub>), concentrated *in vacuo* and purified by FC (silica gel; hexane/EtOAc: 3:2) yielding 76 mg (25 %) of **3** as a white solid. The starting material together with the compound in which the TIPDS group was only cleaved at the O5'-position was recovered and submitted again to the same reaction conditions yielding another 43 mg of **3**, which led to an overall yield of 38%. *R*<sub>f</sub> 0.40 (hexane/EtOAc 1:1). <sup>1</sup>H NMR (300 MHz, CDCl<sub>3</sub>,  $\delta$ (ppm)): 7.62-7.60 (m, 4H, ArH); 7.49-7.33 (m, 5H, ArH); 4.75 (d, *J* = 6.42 Hz, 1H, C1'H); 4.15-4.09 (m, 1H, C2'H, C3'H); 4.05-3.96 (m, 2H, C4'H, C5'H); 3.85 (dd, *J* = 4.0, 11.9 Hz, 1H, C5'H); 0.89 (s, 9H, Si-C(CH<sub>3</sub>)<sub>3</sub>); -0.05 (s, 3H, Si-CH<sub>3</sub>); -0.13 (s, 3H, Si-CH<sub>3</sub>). <sup>13</sup>C NMR (75 MHz, CDCl<sub>3</sub>,  $\delta$ (ppm)): 141.16, 140.66, 138.13 (3s, ArC); 128.77, 127.20, 127.04, 127.01 (4d, ArC) 84.92 (d, C2'); 84.45 (d, C1'); 79.01 (d, C4'); 71.86 (d, C3'); 63.12 (t, C5'); 25.64 (q, Si-C(CH<sub>3</sub>)<sub>3</sub>); 17.95 (s, Si-C(CH<sub>3</sub>)<sub>3</sub>); -4.85, -5.19 (2q, Si-(CH<sub>3</sub>)<sub>2</sub>). HRMS (ESI<sup>+</sup>): calcd for C<sub>23</sub>H<sub>32</sub>O<sub>4</sub>NaSi: 423.1967, found 423.1957.

**4-(5'-*O*-dimethoxytrityl)-2'-*O*-TBDMS- $\beta$ -D-ribofuranosyl)-biphenyl (4)**

To a stirred solution of **3** (117 mg, 0.29 mmol) in dry pyridine (4.1 mL) was added 4,4'-dimethoxytrityl chloride (157 mg, 0.46 mmol) in portions. After 2 h the reaction mixture was dissolved in EtOAc (50 mL) and washed with NaHCO<sub>3</sub> (3  $\times$  20 mL). The organic phase was dried (MgSO<sub>4</sub>) and concentrated *in vacuo*. Purification by FC (silica gel was conditioned with 1-2% TEA in hexane/EtOAc 3:2 prior to loading of the reaction mixture) yielded 169 mg

# Supplementary Material (ESI) for Chemical Communications

# This journal is © The Royal Society of Chemistry 2005

(82%) of **4** as a white foam.  $R_f$  0.74 (hexane/EtOAc 1:1).  $^1\text{H}$  NMR (300 MHz,  $\text{CDCl}_3$ ,  $\delta$ (ppm)): 7.44-7.17 (m, 18H, ArH); 6.84 (d, 4H, ArH); 4.81 (d,  $J = 7.4$  Hz, 1H, C1'H); 4.24-4.20 (m, 2H, C2'H, C3'H); 4.15-4.12 (m, 1H, C4'H); 3.80 (s, 6H, 2  $\text{CH}_3\text{O}$ -(DMT)); 3.56 (dd,  $J = 2.9, 10.3$  Hz, 1H, C5'H); 3.20 (dd,  $J = 3.3, 9.9$  Hz, 1H, C5'H); 0.88 (s, 9H, Si-C( $\text{CH}_3$ )<sub>3</sub>), -0.08 (s, 3H, Si- $\text{CH}_3$ ); -0.15 (s, 3H, Si- $\text{CH}_3$ ).  $^{13}\text{C}$  NMR (75 MHz,  $\text{CDCl}_3$ ,  $\delta$  (ppm)): 158.60, 158.43, 144.97, 140.87, 140.83, 138.84, 136.09, 135.96 (8s, ArC); 130.15, 130.17, 129.11, 128.75, 128.19, 127.81, 127.74, 127.26, 127.11, 127.04, 127.00, 126.75 (12d, ArC); 113.11 (d, ArC); 86.29 (s, ArC); 84.18 (d, C4'); 79.52 (d, C1'); 72.91 (d, C3'); 64.09 (t, C5'); 25.65 (q, Si-C( $\text{CH}_3$ )<sub>3</sub>); 17.97 (s, Si-C( $\text{CH}_3$ )<sub>3</sub>); -4.96, -5.23 (2q, Si-( $\text{CH}_3$ )<sub>2</sub>). HRMS (ESI<sup>+</sup>): calcd for  $\text{C}_{44}\text{H}_{50}\text{O}_6\text{NaSi}$ : 725.3274, found 725.3286.

**4-(5'-O-dimethoxytrityl- $\beta$ -D-ribofuranosyl)-3'-O-(2-cyanoethyl- $N,N'$ -diisopropyl)-**

**biphenyl-phosphoramidite (5).** To a stirred solution of **4** (155 mg, 0.22 mmol) in dry THF (5.7 mL) was added  $N,N$ -diisopropylethylamine (113  $\mu\text{l}$ , 0.66 mmol) followed by 2-cyanoethyl diisopropylchlorophosphoramidite (74  $\mu\text{l}$ , 0.33 mmol) at room temperature. After 2 h the reaction mixture was concentrated *in vacuo*. Purification by FC (silica gel was conditioned with 1-2% TEA in hexane/EtOAc 9:1 prior to the load of the reaction mixture) hexane/EtOAc 9:1 yielded 175 mg (88 %) of **5** as a white foam.  $R_f$  0.24 (hexane/EtOAc 9:1).  $^1\text{H}$  NMR (300 MHz,  $\text{CDCl}_3$ ,  $\delta$  (ppm)): 7.64-7.19 (m, 18H; ArH); 6.88-6.82 (m, 4H; ArH); 4.85 (m, 1H, C1'H); 4.37-4.15 (m, 2.7 H, C3'H, C2'H,  $\text{CH}_2$ ); 4.04-3.90 (m, 1.3H,  $\text{CH}_2$ ); 3.79 (s, 6H,  $\text{CH}_3\text{O}$ -(DMT)); 3.66-3.54 (m, 2H, C5'H, C2'H); 3.24-3.17 (m, 1H, C5'H); 2.70 (td,  $J = 3.7, 7.0$  Hz, 1H,  $\text{CH}_2\text{CN}$ ); 2.24 (td,  $J = 2.2, 7.0$  Hz, 1H,  $\text{CH}_2\text{CN}$ ); 1.19-1.17 (m, 12H,  $\text{CH}_3$ -*iPr*); 0.99 (d, 2H,  $\text{CH}$ -*iPr*); 0.81 (s, 9H, Si-C( $\text{CH}_3$ )<sub>3</sub>); -0.11 (m, 3H, Si-( $\text{CH}_3$ )<sub>2</sub>); -0.25 (s, 3H, Si-( $\text{CH}_3$ )<sub>2</sub>).  $^{13}\text{C}$  NMR (75 MHz,  $\text{CDCl}_3$ ,  $\delta$  (ppm)): 158.45, 158.43, 144.92, 144.78, 141.00, 140.82, 139.20, 138.89, 136.15, 136.00, 135.92, 135.77 (11s, ArC); 130.19, 130.09, 128.72,

# Supplementary Material (ESI) for Chemical Communications

# This journal is © The Royal Society of Chemistry 2005

128.28, 128.15, 127.84, 127.35, 127.21, 127.04, 126.90, 126.84, 126.76 (12d, ArC); 117.68, 117.28 (2s, CN); 113.03, 113.12, 113.09 (3d, ArC); 86.33, 86.15 (2s, ArC); 84.29, 83.92, 83.03, 82.78 (4d, C4'); 79.74, 79.70 (2d, C1'); 79.21, 79.14 (2d, C2'); 75.19, 75.07, 75.16, 73.97 (4d, C3'); 63.91, 63.74, 59.04, 58.84, 57.58, 55.18 (6t, C5', CH<sub>2</sub>); 55.18 (1q, CH<sub>3</sub>O-(DMT)); 43.47, 43.29, 42.82, 42.66 (4d, C2', CH-*i*Pr); 25.85, 25.82, 25.78, 24.70, 24.58, 24.52 (4q, CH<sub>3</sub>-*i*Pr); 20.40, 20.33, 19.98, 19.89 (4t, CH<sub>2</sub>CN); -4.72, -4.77, -5.24, -5.28 (2q, Si-(CH<sub>3</sub>)<sub>2</sub>). <sup>31</sup>P NMR (202 MHz, CDCl<sub>3</sub>, δ (ppm)): 150.73, 148.29. HRMS (ESI<sup>+</sup>): calcd for C<sub>53</sub>H<sub>68</sub>N<sub>2</sub>O<sub>7</sub>SiP: 903.4533, found 903.4528.

### **Synthesis, deprotection and purification of oligoribonucleotides.**

The RNA oligonucleotides were synthesized on a 1 μmol scale on an Applied Biosystems Expedite Nucleic Acid Synthesizer (8909) using standard phosphoramidite chemistry in the trityl-off mode. The 2'-O-TBDMS protected RNA-phosphoramidites of the natural nucleosides were from *Link Technologies* and the CPG solid supports were from *Glen Research*. The solvents and reagents used for the synthesis were prepared according to the manufacturer's indications. The coupling time for the natural and modified phosphoramidites was 3 min, and 2-ethylthio-1*H*-tetrazole (0.25 M in CH<sub>3</sub>CN) was used as activator. After synthesis, the oligonucleotides were detached and deprotected in 1 mL ethanolic ammonia (EtOH/conc.NH<sub>3</sub> 1:3) at 55°C for 12h. From this point on work continued under sterile conditions. The ethanolic solution was filtered through Titan filters (Teflon, 0.45 μm, *Infochroma AB*) and rinsed two times with 1 mL of the following mixture (EtOH/H<sub>2</sub>O/CH<sub>3</sub>CN 3:1:1). The solution was evaporated to dryness. Then, 1 mL of a TBAF solution (1M in THF) was added to the residue and allowed to stand overnight at rt. Again the sample was evaporated and dissolved in 1 mL H<sub>2</sub>O. The crude oligonucleotides were purified by RP-HPLC (15RPC ST 4.6/100 (*Pharmacia Biotech*); solvent A = 0.1 M triethylammonium

# Supplementary Material (ESI) for Chemical Communications

# This journal is © The Royal Society of Chemistry 2005

acetate in H<sub>2</sub>O. pH 7.0; solvent B= 0.1 M triethylammonium acetate in H<sub>2</sub>O/CH<sub>3</sub>CN 1:4, pH 7.0. All oligonucleotides were routinely characterized by ESI<sup>-</sup>mass spectrometry (see Table S1). Concentrations of oligonucleotides were determined by UV absorption using the Schepartz Lab Biopolymer Calculator.<sup>3</sup> For the Bph-nucleosides, an extinction coefficient of  $\epsilon(260\text{nm}) = 19\ 000$  (biph) was used.

**UV-melting curve analysis and van't Hoff plots.** Thermal denaturation experiments were carried out on a *Varian Cary 100 UV /Vis* spectrometer. Absorbance was monitored at 260nm and the heating rate was set to 0.5 °C min<sup>-1</sup>. A heating-cooling-heating cycle in the temperature range 10-90 °C was performed.  $T_m$ -values at different duplex concentrations (0.6, 1.2, 5.0, 10.0, 20.0, 30.0  $\mu\text{M}$ ) in 10mM NaH<sub>2</sub>PO<sub>4</sub>, 150mM NaCl, pH 7.0 were determined and the calculated values used for the determination of the thermodynamic data of duplex formation. The corresponding  $1/T_m$  vs.  $\ln(c)$  plots are reproduced in Figure S1 and the calculated thermodynamic data (non-self complementary duplex) are depicted in Table S2.

**Table S1:** Purification and mass spectrometric data of RNA-oligonucleotides.

| Entry | Sequence                                        | RP     | $R_t$ | $\epsilon_{260\text{nm}}$<br>[M <sup>-1</sup> cm <sup>-1</sup> ] | ESI/MS<br>calc | ESI/MS<br>found |
|-------|-------------------------------------------------|--------|-------|------------------------------------------------------------------|----------------|-----------------|
| 1     | 5'-rCUAGC <b>Bph</b> GUCAUC-3'                  | 5-35%B | 14.1  | 122 700                                                          | 3774.26        | 3773.75         |
| 2     | 3'-rGAUCG <b>Bph</b> CAGUAG-5'                  | 5-35%B | 14.5  | 134 000                                                          | 3877.36        | 3876.38         |
| 3     | 5'-rCUAGC ( <b>Bph</b> ) <sub>2</sub> GUCAUC-3' | 5-35%B | 22.4  | 141 700                                                          | 4122.54        | 4122.13         |
| 4     | 3'-rGAUCG ( <b>Bph</b> ) <sub>2</sub> CAGUAG-5' | 5-35%B | 21.2  | 153 000                                                          | 4225.63        | 4225.00         |
| 5     | 5'-rCUAGC ( <b>Bph</b> ) <sub>3</sub> GUCAUC-3' | 5-40%B | 24.2  | 160 700                                                          | 4470.82        | 4470.00         |
| 6     | 3'-rGAUCG ( <b>Bph</b> ) <sub>3</sub> CAGUAG-5' | 5-40%B | 24.1  | 172 000                                                          | 4573.91        | 4573.00         |
| 7     | 5'-rCUAGCGUCAUC-3'                              | 5-35%B | 11.0  | 103 700                                                          | 3425.98        | 3425.25         |
| 8     | 3'-rGAUCGCAGUAG-5'                              | 0-20%B | 20.8  | 115 000                                                          | 3529.08        | 3528.13         |

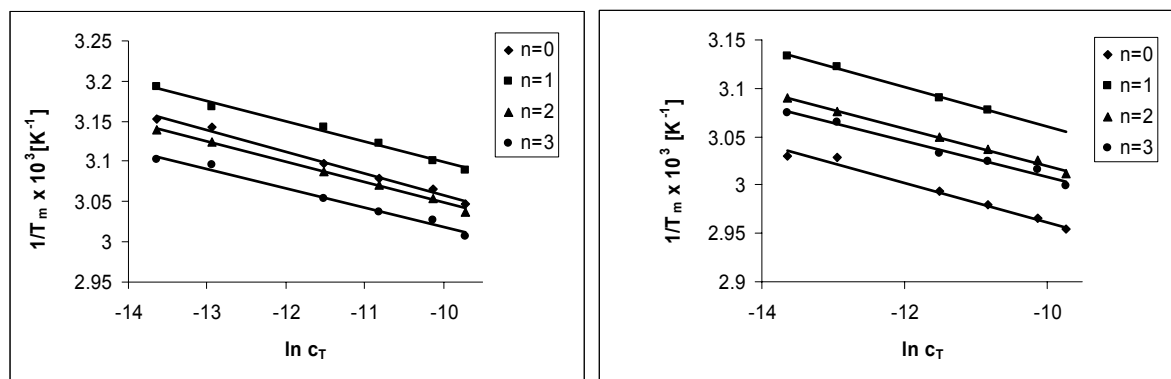

**Figure S1:** Thermodynamics from DNA- (left) and RNA-duplexes (right) with  $n=0-3$ ; Linear regression of DNA- duplexes with  $R^2=0.9912$  ( $n=0$ ),  $0.9910$  ( $n=1$ ),  $0.9964$  ( $n=2$ ),  $0.9852$  ( $n=3$ ), and RNA-duplexes  $R^2=0.9848$  ( $n=0$ ),  $0.9967$  ( $n=1$ ),  $0.9968$  ( $n=2$ ),  $0.9884$  ( $n=3$ ).

**Table S2:** Thermodynamic data of DNA- and RNA-duplexes with  $n= 0-3$ .

| $5' \text{ -GAT GAC (Bph)}_n \text{ GC TAG-3'}$ $3' \text{ -CTA CTG (Bph)}_n \text{ CG ATC-5'}$ |                                           |     |                                                          |     |                                                              |      |
|-------------------------------------------------------------------------------------------------|-------------------------------------------|-----|----------------------------------------------------------|-----|--------------------------------------------------------------|------|
| n                                                                                               | - $\Delta H$<br>[kcal mol <sup>-1</sup> ] |     | - $\Delta S$<br>[cal K <sup>-1</sup> mol <sup>-1</sup> ] |     | - $\Delta G^{25^\circ\text{C}}$<br>[kcal mol <sup>-1</sup> ] |      |
|                                                                                                 | DNA                                       | RNA | DNA                                                      | RNA | DNA                                                          | RNA  |
| 0                                                                                               | 73                                        | 98  | 200                                                      | 266 | 13.2                                                         | 18.1 |
| 1                                                                                               | 78                                        | 97  | 220                                                      | 273 | 12.7                                                         | 15.6 |
| 2                                                                                               | 78                                        | 103 | 216                                                      | 286 | 13.9                                                         | 16.9 |
| 3                                                                                               | 82                                        | 107 | 223                                                      | 299 | 14.9                                                         | 17.7 |

## References

- 1 C. Brotschi, G. Mathis, C. J. Leumann, *Chem. Eur. J.*, 2005, in press,
- 2 S. Hoshika, N. Minakawa, A. Matsuda, *Nucleic Acids Res.*, 2004, **32**, 3815-3825
- 3 <http://paris.chem.yale.edu>
